# Supplementary material
Source: publisher figshare collection journal article supplement (https://frontiersin.figshare.com/ndownloader/files/15301331)
Supplement: Supplementary file [file 15301331]

## Supplementary Material

### 1 Supplementary Figures and Tables

#### 1.1 Supplementary Figures

|             |                                                                                  |     |
|-------------|----------------------------------------------------------------------------------|-----|
| Majority    | MDRPXVSGPMDLPI MHDS DRYEL VKDI GSGNFGVARL MRDKQSNEL VAVKYI ERGEKI DENVKREI I NHR |     |
|             | 10 20 30 40 50 60 70                                                             |     |
| Peptide 1-4 | -----MHDS DRYEL VKDI GSGNFGVARL MRDKQSNEL VAVKYI ERGEKI DENVKREI I NHR           | 56  |
| CbSnRK2.6   | MDRPGVSGPMDLPI MHDS DRYEL VKDI GSGNFGVARL MRDKQSNEL VAVKYI ERGEKI DENVKREI I NHR | 70  |
| AtSnRK2.6   | MDRPAVSGPMDLPI MHDS DRYEL VKDI GSGNFGVARL MRDKQSNEL VAVKYI ERGEKI DENVKREI I NHR | 70  |
| Majority    | SLRHPNI VRFKEVI LTPHLAI VMEYASGGELFERI CNAGRFSEDEARFFFQQLI SGVSYCHDMQVCHRD       |     |
|             | 80 90 100 110 120 130 140                                                        |     |
| Peptide 1-4 | SLRHPNI VRFKEVI LTPHLAI VMEYASGGELFERI CNAGRFSEDEARFFFQQLI SGVSYCHDMQVCHRD       | 126 |
| CbSnRK2.6   | SLRHPNI VRFKEVI LTPHLAI VMEYASGGELFERI CNAGRFSEDEARFFFQQLI SGVSYCHDMQVCHRD       | 140 |
| AtSnRK2.6   | SLRHPNI VRFKEVI LTPHLAI VMEYASGGELFERI CNAGRFSEDEARFFFQQLI SGVSYCHAMQVCHRD       | 140 |
| Majority    | LKLENTLLDGSPAPRLKI CDFGYSKSSVL HSQPKSTVGTPAYI APEVLLKKEYDGKI ADVWSCGVTLYVM       |     |
|             | 150 160 170 180 190 200 210                                                      |     |
| Peptide 1-4 | LKLENTLLDGSPAPRLKI CDFGYSKSSVL HSQPKSTVGTPAYI APEVLLKKEYDGKI ADVWSCGVTLYVM       | 196 |
| CbSnRK2.6   | LKLENTLLDGSPAPRLKI CDFGYSKSSVL HSQPKSTVGTPAYI APEVLLKKEYDGKI ADVWSCGVTLYVM       | 210 |
| AtSnRK2.6   | LKLENTLLDGSPAPRLKI CDFGYSKSSVL HSQPKSTVGTPAYI APEVLLKKEYDGKI ADVWSCGVTLYVM       | 210 |
| Majority    | LVGAYPFEDPEEPKNFRKTI HRI LNVQYAI PDYVHI SPECRHLI SRI FVADPEKRI SI PEI RNHEWFLKN  |     |
|             | 220 230 240 250 260 270 280                                                      |     |
| Peptide 1-4 | LVGAYPFEDPEEPKNFRKTI HRI LNVQYAI PDYVHI SPECRHLI SRI FVADPEKRI SI PEI RNHEWFLKN  | 266 |
| CbSnRK2.6   | LVGAYPFEDPEEPKNFRKTI HRI LNVQYAI PDYVHI SPECRHLI SRI FVADPEKRI SI PEI RNHEWFLKN  | 280 |
| AtSnRK2.6   | LVGAYPFEDPEEPKNFRKTI HRI LNVQYAI PDYVHI SPECRHLI SRI FVADPAKRI SI PEI RNHEWFLKN  | 280 |
| Majority    | LPADLMNDNAMNSQFDES DQPGQSI EEI MQI I AEATVPPAGSQSL NHYLTGSLDI DDEMDDLESDLDDL     |     |
|             | 290 300 310 320 330 340 350                                                      |     |
| Peptide 1-4 | LPADLMNDNAMNSQFDES DQPGQSI EEI MQI I AEATVPPAGSQSL NHYLTGSLDI DDEMDDLESDLDDL     | 336 |
| CbSnRK2.6   | LPADLMNDNAMNSQFDES DQPGQSI EEI MQI I AEATVPPAGSQSL NHYLTGSLDI DDEMDDLESDLDDL     | 350 |
| AtSnRK2.6   | LPADLMNDNTMTTQFDES DQPGQSI EEI MQI I AEATVPPAGTQNL NHYLTGSLDI DDEMEELESDLDDL     | 350 |
| Majority    | DI DSSGEI VYAM                                                                   |     |
|             | 360                                                                              |     |
| Peptide 1-4 | DI DSSGEI VYAM                                                                   | 348 |
| CbSnRK2.6   | DI DSSGEI VYAM                                                                   | 362 |
| AtSnRK2.6   | DI DSSGEI VYAM                                                                   | 362 |

**FIGURE S1 |** Alignment of the amino acid sequences of Peptide1-4, CbSnRK2.6, and AtSnRK2.6. Peptide1-4, the four positive clones by yeast two hybrid; CbSnRK2.6, *Chorispora bungeana* SnRK2.6/OST1 (QBA17182.1); AtSnRK2.6, *Arabidopsis thaliana* SnRK2.6/OST1 (NP\_567945.1).

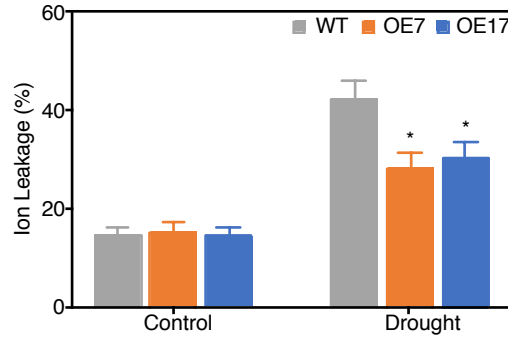

**FIGURE S2** | Ion leakage of WT and transgenic lines after drought stress. Four-week-old wild type (WT) and transgenic tobacco lines OE7 and OE17 (*35S:CbABF1*) were drought stressed by withholding water for 12 d, and the leaves were detached for ion leakage assay. Error bars represent SD (n = 18). Two-way ANOVA (Tukey test) was performed, and statistically significant differences are indicated by asterisks (\*  $P < 0.05$ ). Values shown are derived from experiments that were performed three times with similar results, and representative data from one repetition are presented.

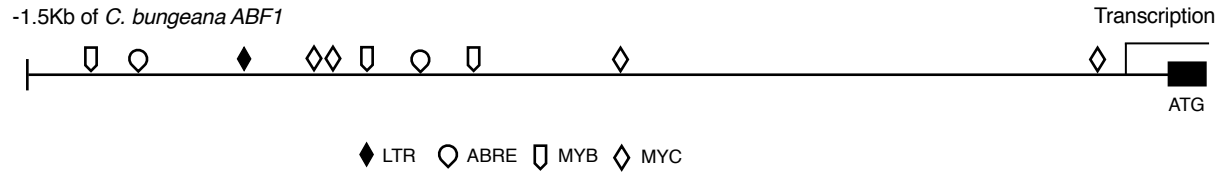

**FIGURE S3** | Distribution of major stress-related *cis*-elements in the promoter region of *CbABF1*.

## 1.2 Supplementary Tables

**TABLE S1** | List of primers used in present study.

| Genes         | Purpose                               | Primers | Sequences (5'-3')                       |
|---------------|---------------------------------------|---------|-----------------------------------------|
| <i>CbABF1</i> | 5' RACE                               | 5TR     | AGGCGATGGATGCTCCTTCGAC                  |
|               | 3' RACE                               | 3TR     | AGGCTGAAATTATGAAAACCCATAATAACGAGG       |
| <i>CbABF1</i> | q-PCR                                 | AQ-F    | AACACATTAGGTGAGCCAGG                    |
|               |                                       | AQ-R    | AGCAGGAACAGAACCACTAATAG                 |
| <i>CbABF1</i> | Full-length <i>ABF1</i> amplification | YH1     | AATGCATATGATGGGTACTCAAATCGACTTCAACAACAC |
|               |                                       | YH393   | TCCAGTCGACTTACCAAGGACCCGTAAGCGTTC       |

|                  |                                              |        |                                                                 |
|------------------|----------------------------------------------|--------|-----------------------------------------------------------------|
| <i>CbABF1</i>    | Truncated<br><i>ABF1Δ1</i><br>amplification  | YH1    | AATGCATATGATGGGTACTCAAATCGACTTCAACAACAC                         |
|                  |                                              | YH89   | TCCAGTCGACACTAATAGGTTGTGCTGGGGCTGC                              |
| <i>CbABF1</i>    | Truncated<br><i>ABF1Δ2</i><br>amplification  | YH90   | AATGCATATGGGTTCTGTTCTGCTGGTGAG                                  |
|                  |                                              | YH393  | TCCAGTCGACTTACCAAGGACCCGTAAGCGTTC                               |
| <i>CbABF1</i>    | To construct<br><i>ABF1Δ2</i><br>effector    | DL90   | CGGGATCCGGTTCTGTTCTGCTGGTGAG                                    |
|                  |                                              | YH393  | TCCAGTCGACTTACCAAGGACCCGTAAGCGTTC                               |
| <i>CbABF1</i>    | To construct<br><i>ABF1</i><br>effector      | DL1    | CGGGATCCATGGGTACTCAAATCGACTTCAACAACAC                           |
|                  |                                              | YH393  | TCCAGTCGACTTACCAAGGACCCGTAAGCGTTC                               |
| <i>CbSnRK2.6</i> | To construct<br><i>CbSnRK2.6</i><br>effector | DLS1   | CGGGATCCATGGATCGGCCAGGAGTGAGTGGTC                               |
|                  |                                              | DLS362 | TCCAGTCGACTCACATTGCATACACAATCTCTCC                              |
| <i>CbABF1</i>    | PD-F                                         |        | <u>GGGGACAAGTTTGTACAAAAAAGCAGGCTT</u> CATGGGTACTCAAATCGACTTCAAC |
|                  | Gateway                                      | PD-R   | <u>GGGGACCACTTTGTACAAGAAAGCTGGGT</u> CCCAGGACCCGTAAGCGTTC       |
| <i>CbACTIN</i>   | qRT-PCR                                      | AC-F   | GGATGCTTACGTTGGTGACGA                                           |
|                  |                                              | AC-R   | TCTCCATGTCATCCCAGTTGC                                           |
| <i>CbSnRK2.6</i> | 3' RACE                                      | 3TR    | TTCTAAGTCTTCGGTGTTACATTTCGC                                     |
|                  | 5' RACE                                      | 5TR    | TAACATACAGAGTTACCCACAAGACC                                      |
| <i>NtLEA5</i>    | qRT-PCR                                      | LE-F   | TTGAATCTGGGGTTTGGTT                                             |
|                  |                                              | LE-R   | GGAAGCATTGACGAGCTAGG                                            |
| <i>NtERD10C</i>  | qRT-PCR                                      | ER-F   | AACGTGGAGGCTACAGATCG                                            |
|                  |                                              | ER-R   | GTTCTCTTGGGCATGAGTT                                             |
| <i>NtLTP1</i>    | qRT-PCR                                      | LT-F   | GCAGAAGCCATAACCTGTGG                                            |
|                  |                                              | LT-R   | CAGTGGAAGGGCTGATCTTG                                            |
| <i>NtPOX</i>     | qRT-PCR                                      | POX-F  | TTAGCTGCTCGTGATGCTGT                                            |
|                  |                                              | POX-R  | AGTTGAGCTCTGAGGGTCCA                                            |
| <i>NtSOD</i>     | qRT-PCR                                      | SOD-F  | CTCCTACCGTCGCCAAAT                                              |
|                  |                                              | SOD-R  | GCCCAACCAAGAGAACCC                                              |
| <i>NtCAT1</i>    | qRT-PCR                                      | CAT-F  | AGCCGGTGGGAAGATTAGTT                                            |
|                  |                                              | CAT-R  | AAGCAAGCTTTTGACCCAGA                                            |
| <i>NtEF1-α</i>   | qRT-PCR                                      | EF1-F  | TGAGATGCACCACGAAGCTC                                            |
|                  |                                              | EF1-R  | CCAACATTGTCACCAGGAAGTG                                          |

Note: The underlined fragments are attB1 and attB2 sequences according to the gateway system.
